# Supplementary material
Source: publisher figshare collection journal article supplement (https://asha.figshare.com/ndownloader/files/34817623)
Supplement: Supplementary file 1 [file 34817623]

## Sheet: README
Supplemental material, Malloy et al., “Delayed Auditory Feedback Elicits Specific Patterns of Serial Order Errors in a Paced Syllable Sequence Production Task,” JSLHR, https://doi.org/10.1044/2022_JSLHR-21-00427
Supplemental Material S3. This spreadsheet provides multiple worksheets, each of which provides a
tabular summary for an individual generalized linear mixed-effects logistic regression model for one error
type (see Error Patterns by Type section). Tables describe fixed and random effects and provide pairwise
contrasts for delay.
* Address any questions to corresponding author: j.bohland@pitt.edu
Tables describe statistical effects estimated using generalized linear mixed-effects logistic regression models
Each tab includes a summary table for one error type (see manuscript for details)
Tables describe fixed and random effects and provide pairwise contrasts for delay
Quick Links to individual tables:
Repetition Errors:
Vowel repetitions
Consonant repetitions
Syllable repetitions
Exchange Errors:
Vowel exchanges
Consonant exchanges
Anticipation Errors:
Vowel anticipations
Consonant anticipations
Other:
Distortions
Artificial "stutters"
Vowel omissions

## Sheet: Vowel Repetition
Vowel Repetition (V-Rep)
Random Effects	Variance			Model Fit	Value
Subject (Intercept)	0.825			AIC	1274.88
Sequence (Intercept)	0.064			BIC	1325.39
Fixed Effects	Odds Ratio	CI (95%)	z	p
Intercept	0.001	0.000, 0.004	-9.291	<0.001
Delay (50 ms)	5.096	0.959, 27.075	1.911	0.056
Delay (100 ms)	27.941	6.695, 116.619	4.568	<0.001
Delay (150 ms)	60.207	14.879, 243.626	5.746	<0.001
Delay (200 ms)	96.445	24.081, 386.267	6.454	<0.001
Delay (250 ms)	99.025	24.729, 396.532	6.492	<0.001
Pairwise Contrasts	vs. 0 ms	vs. 50 ms	vs. 100 ms	vs. 150 ms	vs. 200 ms
Delay (50 ms)	5.10 (0.395)
Delay (100 ms)	27.94 (<0.001)	5.48 (0.020)
Delay (150 ms)	60.21 (<0.001)	11.82 (<0.001)	2.15 (0.059)
Delay (200 ms)	96.44 (<0.001)	18.93 (<0.001)	3.45 (<0.001)	1.60 (0.232)
Delay (250 ms)	99.03 (<0.001)	19.43 (<0.001)	3.54 (<0.001)	1.64 (0.177)	1.03 (1.000)

## Sheet: Consonant Repitition
Consonant Repetition (C-Rep)
Random Effects	Variance			Model Fit	Value
Subject (Intercept)	0.441			AIC	500.016
Sequence (Intercept)	0.041			BIC	550.527
Fixed Effects	Odds Ratio	CI (95%)	z	p
Intercept	0.007	0.003, 0.015	-13.024	<0.001
Delay (50 ms)	1.471	0.574, 3.769	0.804	0.422
Delay (100 ms)	0.83	0.266, 2.591	-0.321	0.748
Delay (150 ms)	1.907	0.795, 4.574	1.446	0.148
Delay (200 ms)	1.683	0.682, 4.154	1.129	0.259
Delay (250 ms)	1.043	0.365, 2.984	0.079	0.937
Pairwise Contrasts	vs. 0 ms	vs. 50 ms	vs. 100 ms	vs. 150 ms	vs. 200 ms
Delay (50 ms)	1.471 (0.967)
Delay (100 ms)	0.830 (1.000)	0.564 (0.945)
Delay (150 ms)	1.907 (0.699)	1.297 (0.996)	2.298 (0.744)
Delay (200 ms)	1.683 (0.869)	1.144 (1.000)	2.028 (0.862)	0.883 (1.000)
Delay (250 ms)	1.043 (1.000)	0.709 (0.992)	1.257 (0.999)	0.547 (0.893)	0.620 (0.962)

## Sheet: Syllable Repetition
Syllable Repetition (Syl-Rep)
Random Effects	Variance			Model Fit	Value
Subject (Intercept)	1.361			AIC	567.274
Sequence (Intercept)	0.055			BIC	617.785
Fixed Effects	Odds Ratio	CI (95%)	z	p
Intercept	0.003	0.001, 0.009	-11.646	<0.001
Delay (50 ms)	0.544	0.123, 2.401	-0.804	0.421
Delay (100 ms)	1.374	0.472, 4.000	0.582	0.56
Delay (150 ms)	1.672	0.610, 4.585	0.998	0.318
Delay (200 ms)	5.68	2.599, 12.413	4.354	<0.001
Delay (250 ms)	6.315	2.921, 13.650	4.686	<0.001
Pairwise Contrasts	vs. 0 ms	vs. 50 ms	vs. 100 ms	vs. 150 ms	vs. 200 ms
Delay (50 ms)	0.544 (0.967)
Delay (100 ms)	1.374 (0.992)	2.527 (0.864)
Delay (150 ms)	1.672 (0.919)	3.076 (0.716)	1.217 (1.000)
Delay (200 ms)	5.680 (<0.001)	10.449 (0.015)	4.135 (0.048)	3.397 (0.087)
Delay (250 ms)	6.315 (<0.001)	11.617 (0.009)	4.597 (0.023)	3.777 (0.042)	1.112 (1.000)

## Sheet: Vowel Exchange
Vowel Exchange (V-Ex)
Random Effects	Variance			Model Fit	Value
Subject (Intercept)	0.725			AIC	361.944
Sequence (Intercept)	0.218			BIC	412.455
Fixed Effects	Odds Ratio	CI (95%)	z	p
Intercept	0.002	0.001, 0.007	-10.578	<0.001
Delay (50 ms)	1.501	0.356, 6.330	0.553	0.58
Delay (100 ms)	1.503	0.356, 6.340	0.555	0.579
Delay (150 ms)	2.564	0.735, 8.947	1.477	0.14
Delay (200 ms)	1.01	0.195, 5.244	0.012	0.99
Delay (250 ms)	7.271	2.588, 20.427	3.764	<0.001
Pairwise Contrasts	vs. 0 ms	vs. 50 ms	vs. 100 ms	vs. 150 ms	vs. 200 ms
Delay (50 ms)	1.134 (0.994)
Delay (100 ms)	1.331 (0.994)	1.010(1.000)
Delay (150 ms)	2.564 (0.679)	1.709 (0.979)	1.039 (0.979)
Delay (200 ms)	1.010 (1.000)	0.673 (0.998)	0.993 (0.998)	0.283 (0.879)
Delay (250 ms)	7.271 (0.0023)	4.854 (0.139)	4.831 (0.139)	2.833(0.361)	7.194 (0.099)

## Sheet: Consonant Exchange
Consonant Exchange (C-Ex)
Random Effects	Variance			Model Fit	Value
Subject (Intercept)	1.225			AIC	1189.6
Sequence (Intercept)	0.509			BIC	1240.11
Fixed Effects	Odds Ratio	CI (95%)	z	p
Intercept	0.017	0.008, 0.035	-10.964	<0.001
Delay (50 ms)	1.134	0.659, 1.952	0.453	0.65
Delay (100 ms)	1.331	0.790, 2.242	1.074	0.283
Delay (150 ms)	1.383	0.833, 2.297	1.253	0.21
Delay (200 ms)	1.322	0.784, 2.228	1.048	0.295
Delay (250 ms)	1.216	0.712, 2.077	0.715	0.474
Pairwise Contrasts	vs. 0 ms	vs. 50 ms	vs. 100 ms	vs. 150 ms	vs. 200 ms
Delay (50 ms)	1.134 (0.998)
Delay (100 ms)	1.331 (0.892)	1.174 (0.996)
Delay (150 ms)	1.383 (0.811)	1.220 (0.988)	1.039 (1.000)
Delay (200 ms)	1.322 (0.902)	1.166 (0.997)	0.993 (1.000)	0.956 (1.000)
Delay (250 ms)	1.216 (0.980)	1.072 (1.000)	0.914 (1.000)	0.879 (0.998)	0.920 (1.000)

## Sheet: Vowel Anticipation
Vowel Anticipation (V-Ant)
Random Effects	Variance			Model Fit	Value
Subject (Intercept)		0.6		AIC	360.851
Sequence (Intercept)		0.624		BIC	411.362
Fixed Effects	Odds Ratio	CI (95%)	z	p
Intercept	0.005	0.002, 0.012	-11.689	<0.001
Delay (50 ms)	0.734	0.235, 2.289	-0.533	0.594
Delay (100 ms)	0.61	0.171, 2.176	-0.761	0.446
Delay (150 ms)	1.004	0.351, 2.871	0.008	0.994
Delay (200 ms)	0.187	0.024, 1.440	-1.61	0.107
Delay (250 ms)	1.029	0.360, 2.947	0.054	0.957
Pairwise Contrasts	vs. 0 ms	vs. 50 ms	vs. 100 ms	vs. 150 ms	vs. 200 ms
Delay (50 ms)	0.734 (0.995)
Delay (100 ms)	0.610 (0.974)	0.832 (1.000)
Delay (150 ms)	1.004 (1.000)	1.369 (0.997)	1.645 (0.985)
Delay (200 ms)	0.187 (0.592)	0.255 (0.829)	0.306 (0.911)	0.186 (0.647)
Delay (250 ms)	1.029 (1.000)	1.403 (0.996)	1.687 (0.981)	1.025 (1.000)	5.512 (0.633)

## Sheet: Consonant Anticipation
Consonant Anticipation (C-Ant)
Random Effects	Variance			Model Fit	Value
Subject (Intercept)	1.725			AIC	651.739
Sequence (Intercept)	0.111			BIC	702.25
Fixed Effects	Odds Ratio	CI (95%)	z	p
Intercept	0.006	0.002, 0.014	-11.097	-11.097
Delay (50 ms)	1.013	0.448, 2.290	0.032	0.032
Delay (100 ms)	1.258	0.588, 2.690	0.592	0.592
Delay (150 ms)	1.263	0.591, 2.698	0.603	0.547
Delay (200 ms)	1.587	0.771, 3.266	1.255	0.209
Delay (250 ms)	1.97	1.001, 3.879	1.963	0.05
Pairwise Contrasts	vs. 0 ms	vs. 50 ms	vs. 100 ms	vs. 150 ms	vs. 200 ms
Delay (50 ms)	1.01 (1.000)
Delay (100 ms)	1.26 (0.992)	1.24 (0.998)
Delay (150 ms)	1.26 (0.991)	1.25 (0.997)	1.00 (1.000)
Delay (200 ms)	1.59 (0.809)	1.57 (0.924)	1.26 (0.995)	1.26 (0.995)
Delay (250 ms)	1.97 (0.364)	1.94 (0.657)	1.57 (0.887)	1.56 (0.890)	1.24 (0.994)

## Sheet: Distortion 
Distortion
Random Effects	Variance			Model Fit	Value
Subject (Intercept)		0.56		AIC	933.861
Sequence (Intercept)		0		BIC	984.372
Fixed Effects	Odds Ratio	CI (95%)	z	p
Intercept	0.006	0.003, 0.012	-13.614	<0.001
Delay (50 ms)	1	0.318, 3.148	0	1
Delay (100 ms)	1.509	0.553, 4.113	0.804	0.421
Delay (150 ms)	6.367	3.049, 13.295	4.927	<0.001
Delay (200 ms)	8.398	4.119, 17.122	5.855	<0.001
Delay (250 ms)	11.135	5.566, 22.277	6.812	<0.001
Pairwise Contrasts	vs. 0 ms	vs. 50 ms	vs. 100 ms	vs. 150 ms	vs. 200 ms
Delay (50 ms)	1.00 (1.000)
Delay (100 ms)	1.51 (0.967)	1.51 (0.988)
Delay (150 ms)	6.37 (<0.001)	6.37 (0.007)	4.22 (0.020)
Delay (200 ms)	8.40 (<0.001)	8.40 (0.001)	5.57 (0.002)	1.32 (0.920)
Delay (250 ms)	11.14 (<0.001)	11.14 (<0.001)	7.38 (<0.001)	1.75 (0.285)	1.33 (0.866)

## Sheet: Artificial Stutter
Artificial Stutter
Random Effects	Variance			Model Fit	Value
Subject (Intercept)	1.686			AIC	432.256
Sequence (Intercept)	0.184			BIC	476.453
Fixed Effects	Odds Ratio	CI (95%)	z	p
Intercept	0	0, 0.002	-7.559	<0.001
Delay (100 ms)	33.66	4.236, 267.459	3.325	<0.001
Delay (150 ms)	45.024	5.819, 348.385	3.647	<0.001
Delay (200 ms)	36.214	4.609, 284.529	0.494	<0.001
Delay (250 ms)	48.399	6.294, 372.146	3.728	<0.001
Pairwise Contrasts	vs. 0-50 ms	vs. 100 ms	vs. 150 ms	vs. 200 ms
Delay (100 ms)	33.660 (0.0079)
Delay (150 ms)	45.024 (0.0025)	1.338 (0.968)
Delay (200 ms)	36.214 (0.0058)	1.076 (1.000)	0.804 (0.988)
Delay (250 ms)	48.399 (0.0018)	1.438 (0.9267)	1.075 (1.000)	1.336 (0.963)
Note that this model was fit with 0 and 50 ms conditions collapsed since no examples
of this error type were seen at 0 delay

[truncated: 1 more sheets: Vowel Omission]
